# Supplementary material for: SAMHD1 acetylation enhances its deoxynucleotide triphosphohydrolase activity and promotes cancer cell proliferation
Source: PubMed Central journal article supplement (PMC5620274; doi:10.18632/oncotarget.19704), 2017-07-31
Supplement: oncotarget-08-68517-s001.pdf [file oncotarget-08-68517-s001.pdf]

# SAMHD1 acetylation enhances its deoxynucleotide triphosphohydrolase activity and promotes cancer cell proliferation

## SUPPLEMENTARY MATERIALS

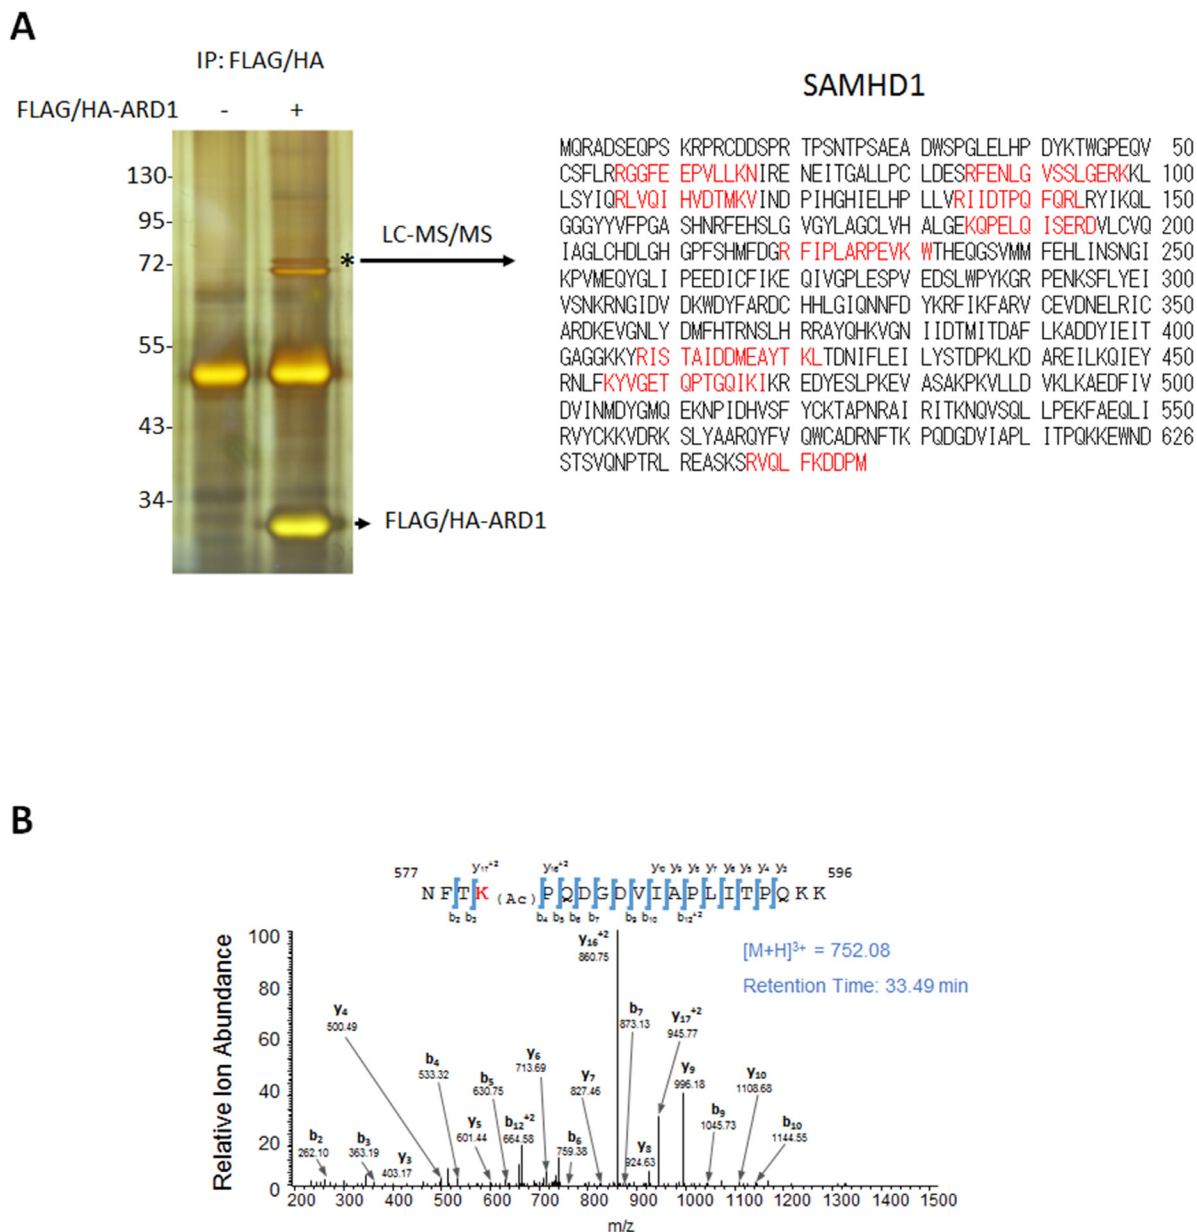

**Supplementary Figure 1: ARD1 wildtype binds and acetylates SAMHD1.** (A) HEK293T cells were transfected with FLAG/HA-ARD1 and lysed proteins were immunoprecipitated, separated by SDS-PAGE and silver stained. \* refers to SAMHD1. (B) The acetylation site in acetylated GST-CTD was identified by LC-MS/MS.

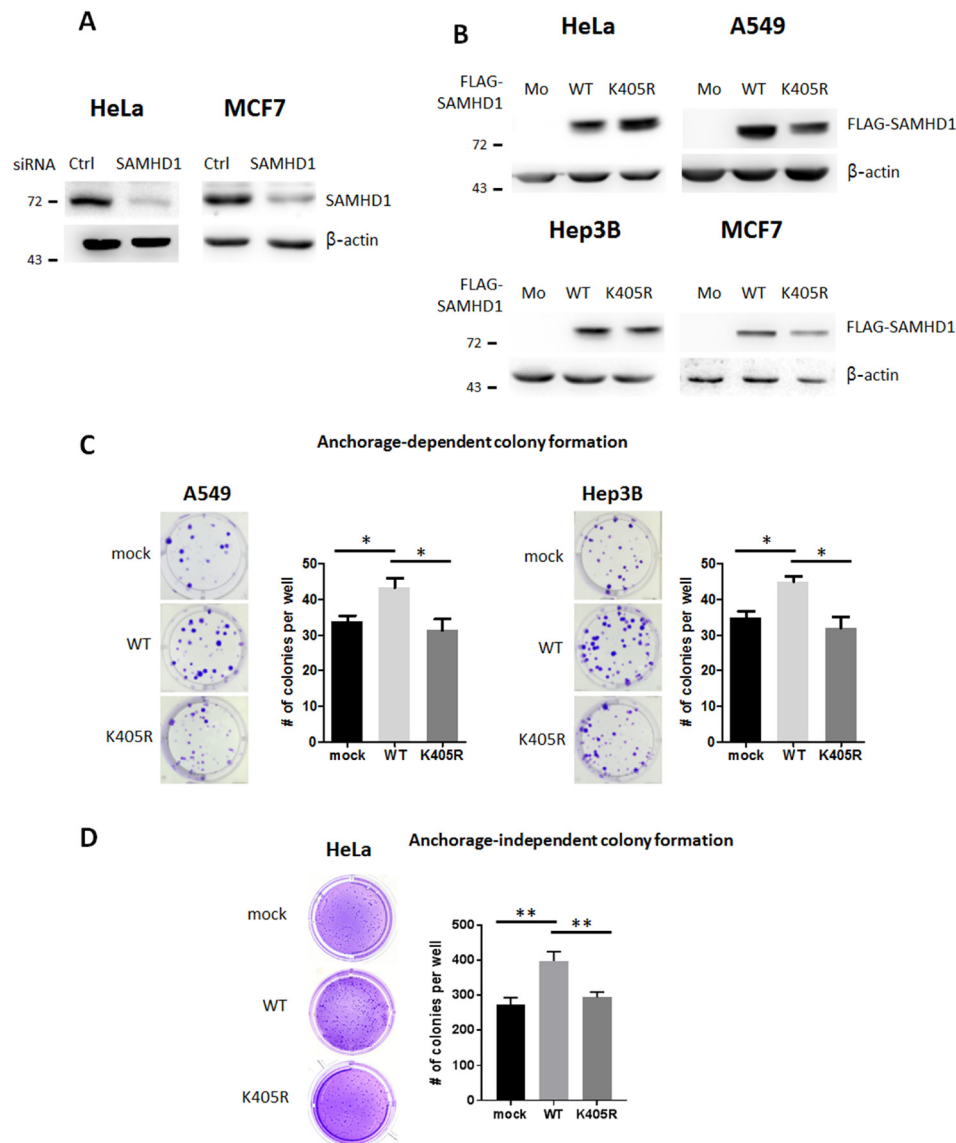

**Supplementary Figure 2: SAMHD1 was silenced or overexpressed in various cancer cells.** (A) HeLa and MCF7 cells were transfected with siCtrl or siSAMHD1 and were lysed after 48–72h. The level of proteins were assessed by western blot. (B) SAMHD1 wildtype or K405R expressing stable cell lines were constructed in HeLa, A549, Hep3B, and MCF7 cells and their protein levels were assessed by western blot. (C) Stable A549 and Hep3B cells expressing SAMHD1 wildtype, K405R or empty vector were subjected to anchorage-dependent colony formation assays. Number of colonies were presented as mean  $\pm$ S.D. (n=3) with representative well pictures. (D) Stable HeLa cells expressing SAMHD1 wildtype, K405R or empty vector were subjected to anchorage-independent colony formation assays. Number of colonies were presented as mean  $\pm$ S.D. (n=3) with representative well pictures.

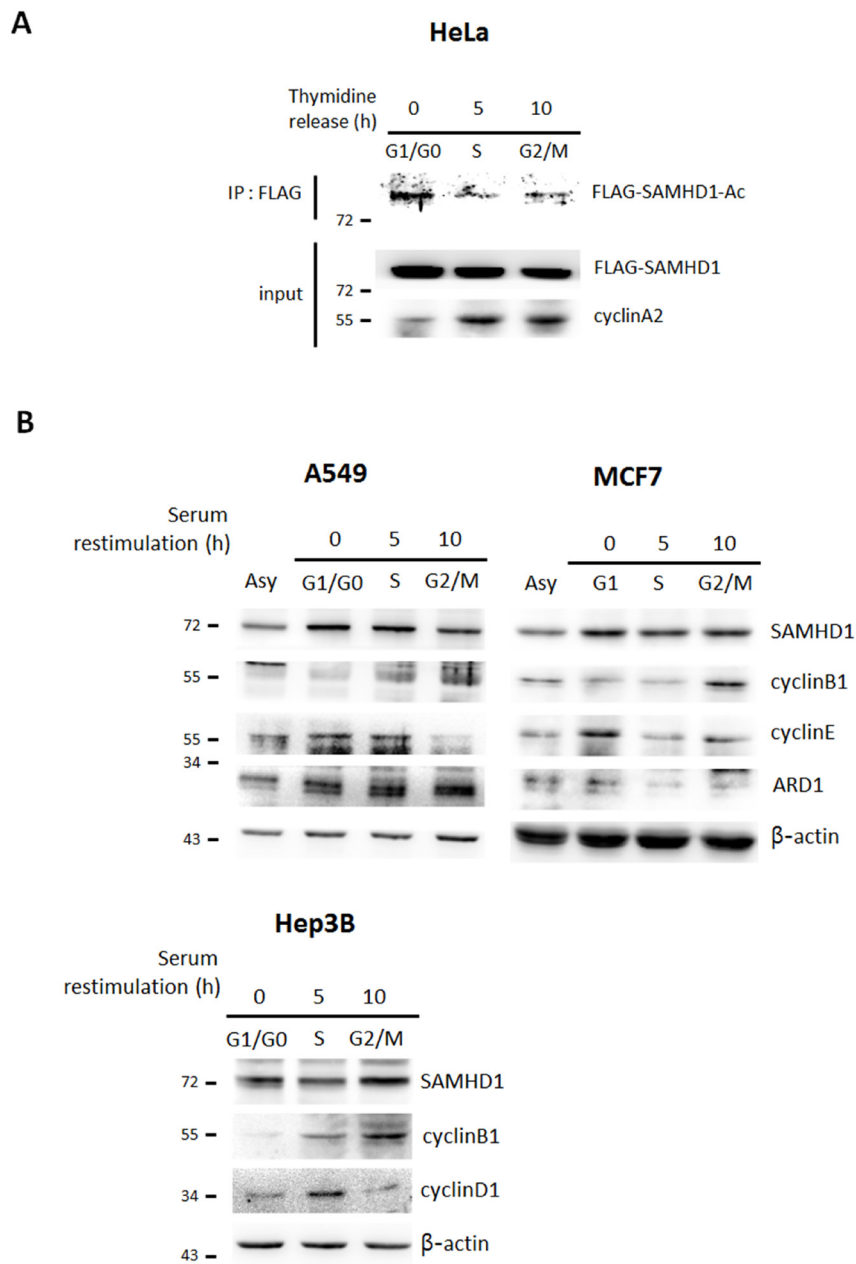

**Supplementary Figure 3: SAMHD1 acetylation and expression levels in cancer cells.** (A) FLAG-SAMHD1 wildtype expressing stable HeLa cells were synchronized to specific cell cycle phases using thymidine-double block method. SAMHD1 was then immunoprecipitated and blotted with an anti-Lyc-Ac antibody. (B) A549, MCF7 and Hep3B cells were synchronized to G1/G0 phase by serum starvation then released for indicated hours to each cell cycle phases. Lysed proteins were assessed by western blot. Asy; asynchronormized.

**Supplementary Table 1: Clinicopathological characteristics of 7 hepatocarcinoma patients**

| Patient No. | Age | Gender | Etiology | Tumor size, max (cm) | Procedure          | Edmonson grade | Cirrhosis |
|-------------|-----|--------|----------|----------------------|--------------------|----------------|-----------|
| 1           | 42  | M      | HBV      | 1.8                  | Surgical resection | 3              | No        |
| 2           | 74  | M      | NBNC     | 10.5                 | Surgical resection | 4              | No        |
| 3           | 48  | M      | HBV      | 3.5                  | Surgical resection | 2              | Yes       |
| 4           | 43  | M      | HBV      | 3.8                  | Surgical resection | 4              | No        |
| 5           | 45  | M      | HCV      | 2.5                  | Surgical resection | 3              | No        |
| 6           | 70  | F      | HBV      | 5.3                  | Surgical resection | 3              | Yes       |
| 7           | 56  | M      | HBV      | 2.2                  | Surgical resection | 3              | No        |

M, male; F, female; HBV, hepatitis B virus; NBNC, non-B non-C; HCV, hepatitis C virus.
